# Supplementary material
Source: HighWire-hosted journal article supplement (https://adc.bmj.com/content/105/8/713)
Supplement: inline-supplementary-material-1 [file inline-supplementary-material-1.pdf]

## On-line supplement

Figure S1. Flow chart of participant recruitment

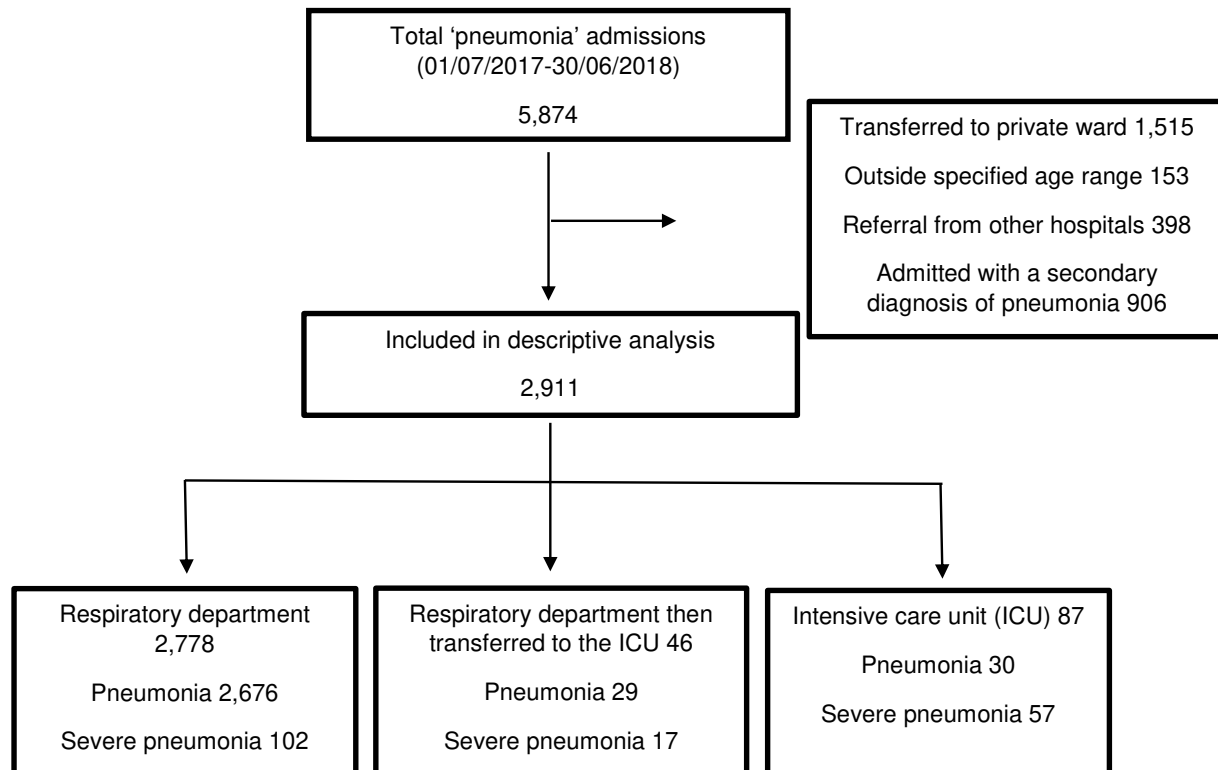

**Table S1. Pre-admission antibiotic use in children admitted to hospital with pneumonia**

| <b>Pre-admission antibiotic used</b> | <b>Respiratory ward</b> | <b>Ward admission followed by ICU transfer</b> | <b>Intensive care unit (ICU)</b> |
|--------------------------------------|-------------------------|------------------------------------------------|----------------------------------|
| <b>Used an antibiotic</b>            | 1406 (50.6)             | 18 (39.1)                                      | 38 (43.7)                        |
| <b>Days of use</b> (median, IQR)     | 3 (3-5)                 | 3.5 (2.0-2.5)                                  | 3 (2-5)                          |
| <b>Antibiotic provider</b>           |                         |                                                |                                  |
| Private clinic                       | 872 (31.4)              | 13 (28.3)                                      | 23 (26.4)                        |
| Pharmacy                             | 353 (12.7)              | 3 (6.5)                                        | 4 (4.6)                          |
| Hospital outpatient clinic           | 505 (18.2)              | 5 (10.9)                                       | 12 (13.8)                        |
| Others <sup>a</sup>                  | 106 (3.8)               | 3 (6.5)                                        | 6 (6.9)                          |
| Unknown <sup>b</sup>                 | 942 (33.9)              | 22 (47.8)                                      | 42 (48.3)                        |
| <b>Antibiotic used<sup>c</sup></b>   |                         |                                                |                                  |
| Amoxicillin                          | 52 (3.7)                | 0                                              | 1 (2.6)                          |
| Amoxi/clav                           | 139 (9.9)               | 3 (16.7)                                       | 2 (5.3)                          |
| Macrolide                            | 98 (7.0)                | 1 (5.6)                                        | 1 (2.6)                          |
| Cephalosporin 1 <sup>st</sup>        | 37 (2.6)                | 1 (5.6)                                        | 0                                |
| Cephalosporin 2 <sup>nd</sup>        | 320 (22.7)              | 3 (16.7)                                       | 8 (21.1)                         |
| Cephalosporin 3 <sup>rd</sup>        | 77 (5.5)                | 3 (16.7)                                       | 4 (10.5)                         |
| Unknown/Others <sup>d</sup>          | 606 (43.1)              | 5 (27.7)                                       | 15 (39.5)                        |
| <b>Non-oral route</b>                |                         |                                                |                                  |
| Intramuscular (IM) <sup>e</sup>      | 38 (2.7)                | 2 (11.0)                                       | 1 (2.6)                          |
| Intravenous (IV) <sup>e</sup>        | 39 (2.8)                | 0                                              | 6 (15.8)                         |
| <b>Total</b>                         | <b>2778</b>             | <b>46</b>                                      | <b>87</b>                        |

Amoxi/clav – amoxicillin with clavulanic acid; ICU – intensive care unit; IQR – interquartile range

<sup>a</sup>including traditional healer, rural clinic; <sup>b</sup>not recorded; <sup>c</sup>using everyone that received an antibiotic as the denominator; <sup>d</sup>mostly unknown, but also included oral clindamycin, quinolones, neomycin inhaler; <sup>e</sup>received at least 1 injection – mostly at private clinic; IM gentamycin or IV 3<sup>rd</sup> generation cephalosporin
